# Supplementary material
Source: Elsevier journal article supplement (https://www.sciencedirect.com/science/article/pii/S217357351730025X)
Supplement: mmc1 [file S217357351730025X:mmc1.docx]

**CUESTIONARIO RETROSPECTIVO DE SATISFACCIÓN DE VIDA LABORAL EN PACIENTE USUARIO DE IC (SVLICr)**

**PRIMERA PARTE: DATOS DEMOGRÁFICOS Y PROFESIONALES**

**Nombre:**

**Edad:**

**Sexo:**

**Fecha de implantación:**

**Fecha de cumplimentación del cuestionario: Día____Mes______Año_________**

**1) ¿Cuál es el nivel de estudios que usted posee?** (*señale con una X el nivel más alto obtenido*)

1. 🞏 Escuela primaria

2. 🞏 Escuela secundaria

3. 🞏 Formación Profesional (FP) de grado medio, FP I, Oficialía Industrial o equivalente, Grado Medio de Música y Danza, Certificados de Escuelas, Oficiales de Idiomas

4. 🞏 FP de grado superior, FP II, Maestría Industrial o equivalente

5. 🞏 Diplomatura universitaria, Arquitectura Técnica, Ingeniería Técnica o equivalente

6. 🞏 Grado Universitario o equivalente

7. 🞏 Licenciatura, Arquitectura, Ingeniería o equivalente

8. 🞏 Máster oficial universitario (a partir de 2006), Especialidades Médicas o análogos

9. 🞏 Doctorado

2) Marque el tipo de actividad laboral que desarrolla actualmente o desarrolló por última vez (*señale con una X*):

1. 🞏 Educación (Magisterio, Educación Infantil, Pedagogía...)

2. 🞏 Artes y Humanidades (Historia, Lenguas, Imagen y Sonido...)

3. 🞏 Derecho y Ciencias Sociales (Administración, Psicología, Economía, Periodismo...)

4. 🞏 Ciencias (Biología, Química, Física, Matemáticas...) e Informática (incluida Ingeniería Informática)

5. 🞏 Arquitectura, Construcción, Formación Técnica e Industrias (Mecánica, Metal, Electrónica, Diseño, Confección, Alimentación, etc., incluidas Ingenierías de estos campos)

6. 🞏 Agricultura, Ganadería, Pesca y Veterinaria (incluida Ingeniería Agrónoma o similar)

7. 🞏 Salud y Servicios Sociales (Medicina, Enfermería, Farmacia, Trabajo Social...)

8. 🞏 Otros servicios (Turismo, Hostelería, Peluquería, Enseñanza Náutica, Militar...)

**PARTE SEGUNDA: ESTADO LABORAL ACTUAL**

**3) ¿Actualmente usted es laboralmente activo?**

*Si, jornada completa* 🞏 *Sí, jornada parcial* 🞏 *No* 🞏

Si la respuesta es *No*

**4) ¿Está usted actualmente desempleado de manera voluntaria?**

*Si* 🞏 *No* 🞏

**5) ¿Cree usted que la razón por la cual está actualmente desempleado es por su problema de audición?**

*Si* 🞏 *No* 🞏

**6) ¿Cuánto tiempo lleva desempleado?**

*3 meses* 🞏 *6 meses* 🞏 *12 meses* 🞏 *24 meses* 🞏 +*24 meses* 🞏

**7) ¿Ha pasado de estar desempleado (o en paro), a estar laboralmente activo después de la implantación?**

*Si* 🞏 *No* 🞏

Si la respuesta es *Si*

**8) ¿Cree usted que la razón para su contratación ha sido poder oír y comunicarse mejor tras la implantación coclear?**

*Si* 🞏 *No* 🞏

**9) ¿Ha pasado de estar laboralmente activo, a estar desempleado (o en paro) después de la implantación?**

*Si* 🞏 *No* 🞏

**10) ¿Cree usted que la razón para su despido ha sido la implantación coclear?**

*Si* 🞏 *No* 🞏

**11) En caso de haber contestado “Sí”, ¿cuál fue el motivo en particular?**

*No podía oír bien*🞏 *Tuve problemas con la recuperación* 🞏 *Demasiadas citas médicas* 🞏 *Tuve que ausentarme demasiados días* 🞏

**12) ¿Ha mantenido su trabajo antes y después de la implantación?**

*Si* 🞏 *No* 🞏

Si la respuesta es *Si*

**13) Por favor, señale su grado de satisfacción laboral después del implante**

*Mucho peor*  *Igual*  *Mucho mejor*

-5 -4 -3 -2 -1 0 +1 +2 +3 +4 +5

**14) ¿Ha cambiado de trabajo después de la implantación?**

*Si* 🞏 *No* 🞏

Si la respuesta es *Si*

**15) Por favor, señale el grado de satisfacción laboral después de la implantación**

*Mucho peor*  *Igual* *Mucho mejor*

-5 -4 -3 -2 -1 0 +1 +2 +3 +4 +5

**16) ¿Actualmente está satisfecho con su trabajo?**

*Insatisfecho Indiferente Muy satisfecho*

-5 -4 -3 -2 -1 0 +1 +2 +3 +4 +5

**17) ¿Después de la implantación, se siente más motivado para ir a trabajar?**

*Sin motivación Igual Muy motivado*

-5 -4 -3 -2 -1 0 +1 +2 +3 +4 +5

**18) ¿En general, después de la implantación se ve usted capaz de cumplir adecuadamente con todas sus obligaciones laborales?**

*Incapaz Igual Muy capaz*

-5 -4 -3 -2 -1 0 +1 +2 +3 +4 +5

**19) Después de la implantación ¿Es capaz de cumplir adecuadamente las tareas telefónicas?**

*Incapaz Igual Muy capaz*

-5 -4 -3 -2 -1 0 +1 +2 +3 +4 +5

**20) ¿Se siente más competente después de la implantación?**

*Muy poco competente Sin cambios Mucho más competente*

-5 -4 -3 -2 -1 0 +1 +2 +3 +4 +5

**21) ¿Siente que tiene que trabajar con más dedicación que el resto de sus compañeros para conservar su puesto de trabajo?**

*Muy duro Igual que el resto Menos que el resto*

-5 -4 -3 -2 -1 0 +1 +2 +3 +4 +5

**22) En el caso de estimar que tiene que trabajar con más dedicación ¿Qué trabajo adicional tiene que hacer?**

…………………………………………………………………………………………………………………………

**23) ¿Cree usted que podría recibir un ascenso por su desempeño laboral después de la implantación?**

*Pocas posibilidades Igual Muchas posibilidades*

-5 -4 -3 -2 -1 0 +1 +2 +3 +4 +5

**24) ¿Cree usted que su sordera es un impedimento para lograr un ascenso laboral?**

*Es la principal causa …Es poco relevante Es irrelevante*

-5 -4 -3 -2 -1 0 +1 +2 +3 +4 +5

**25) ¿Han mejorado o empeorado sus relaciones interpersonales en el ambiente de trabajo después de la implantación?**

*Han empeorado bastante Sin cambios Han mejorado mucho*

-5 -4 -3 -2 -1 0 +1 +2 +3 +4 +5

**26) ¿Se ha sentido alguna vez discriminado/a laboralmente por su sordera?**

*Muy discriminado Poco discriminado No he notado discriminación*

-5 -4 -3 -2 -1 0 +1 +2 +3 +4 +5

**27) ¿Ha mejorado esa sensación de discriminación después de la implantación?**

*Ha empeorado bastante Sin cambios Ha mejorado mucho*

-5 -4 -3 -2 -1 0 +1 +2 +3 +4 +5

**28)** **¿Hay momentos en que ve ventajoso tener un IC en su trabajo, en comparación a su colegas normo oyentes?**

*Si* 🞏 *No* 🞏

Si la respuesta es *Si*

**29) ¿Por qué?** ………………………………………………………………………………………………..

**30) ¿Existen en su trabajo facilidades o ayudas para personas con hipoacusia?**

*No hay facilidades Hay muchas facilidades*

-5 -4 -3 -2 -1 0 +1 +2 +3 +4 +5

**31) ¿Puede hablar por teléfono con personas desconocidas?**

*Si* 🞏 *No* 🞏

**32) ¿Puede hablar por teléfono con personas que le son conocidas?**

*Si* 🞏 *No* 🞏

**33) ¿Su ambiente de trabajo es silencioso o ruidoso?**

Muy ruidoso 🞏 Ruidoso🞏 Poco ruidoso 🞏 Silencioso 🞏

**34) Puede describir aquí en 10 líneas máximo, ¿qué es lo que el Implante Coclear ha cambiado en su vida laboral?** …………………………………………………………………………………………………….
